# Supplementary material for: Antibacterial Activity of Aureonuclemycin Produced by Streptomyces aureus Strain SPRI-371
Source: MDPI journal article supplement (doi:10.3390/molecules27155041), 2022-08-08
Supplement: s1 [file s1]

## Supplementary Materials

**Table S1.** Physiological properties of *Streptomyces aureus* strain SPRI-371 in comparison with those of *Streptomyces aureus* SF 1836.

|                                | SPRI-371 | SF1836 |
|--------------------------------|----------|--------|
| Hydrolysis of starch           | -        | +      |
| Reduction of nitrate           | +        | +      |
| Tyrosinase reaction            | +        | +      |
| Liquefaction of gelatin        | +        | +      |
| Production of melanin          | +        | +      |
| Coagulation of milk            | -        | -      |
| Peptonization of milk          | +        | -      |
| Production of H <sub>2</sub> S | +        | -      |
| Hydrolysis of cellulose        | -        | +      |

+: Positive; -: Negative.

**Table S2.** Utilization of carbon sources by *Streptomyces aureus* strain SPRI-371.

| Carbon source | Growth |
|---------------|--------|
| D-glucose     | +      |
| L-arabinose   | +      |
| D-xylose      | +      |
| D-fructose    | +      |
| Mannitol      | +      |
| L-rhamnose    | +      |
| i- inositol   | +      |
| Sucrose       | -      |
| Raffinose     | -      |

+: Positive; -: Negative

**Table S3.** Comparison of culture properties of *Streptomyces aureus* strain SPRI-371 and *Streptomyces aureus* SF-1836.

|                                         |                         | SPRI-371          | SF-1836                 |
|-----------------------------------------|-------------------------|-------------------|-------------------------|
| Culture characteristics                 | Gao’s agar              | AM: grayish       | AM: Grayish to brownish |
|                                         |                         | R:white           | R: Yellowish            |
|                                         |                         | SP: slight yellow | SP: Yellowish           |
|                                         | Asparagine-glucose agar | AM: gray          | AM: grayish to brownish |
|                                         |                         | R: white          | R: yellowish            |
|                                         |                         | SP: none          | SP: none                |
|                                         | Potato                  | AM: grayish       | AM: grayish to gray     |
|                                         |                         | R: deep brown     | R: deep brown           |
|                                         |                         | SP: deep brown    | SP: deep brown          |
| Growth on cellulose                     | -                       | +                 |                         |
| Inhibitory effect on bacteria and fungi | -                       | +                 |                         |

+: Positive; -: Negative; AM: aerial mycelium; R: reverse; SP: soluble pigment

**Table S4.** The setting of dissolved oxygen parameters in the fermentation of *Streptomyces aureus* strain SPRI-371.

| Time | Treatment A |     |                 | Treatment B |     |                 | Treatment C |     |                 | Treatment D |     |                 | Treatment E |     |                 |
|------|-------------|-----|-----------------|-------------|-----|-----------------|-------------|-----|-----------------|-------------|-----|-----------------|-------------|-----|-----------------|
| (h)  | Stirrer     | Air | PO <sub>2</sub> |
| 0    | 450         | 6   | 100             | 400         | 4   | 100             | 550         | 6   | 100             | 450         | 6   | 100             | 400         | 5   | 100             |
| 20   | 450         | 6   | 60              | 400         | 4   | 40              | 550         | 7   | 86              | 600         | 7   | 92              | 400         | 5   | 21              |
| 40   | 500         | 6.5 | 25              | 450         | 4   | 12              | 600         | 7.5 | 43              | 650         | 8   | 65              | 400         | 5   | 0               |
| 60   | 550         | 7   | 6               | 450         | 5   | 0               | 600         | 8   | 52              | 700         | 8   | 56              | 400         | 5   | 0               |
| 80   | 550         | 7.5 | 0.5             | 450         | 5   | 0               | 600         | 8   | 56              | 700         | 8   | 48              | 400         | 5   | 0               |
| 100  | 500         | 6   | 34              | 500         | 6   | 28              | 550         | 7   | 48              | 650         | 8   | 69              | 400         | 5   | 0               |
| 110  | 500         | 6   | 50              | 500         | 6   | 60              | 500         | 6   | 43              | 600         | 7.5 | 72              | 400         | 5   | 28              |
| 120  | 500         | 6   | 69              | 500         | 7   | 80              | 450         | 5   | 41              | 600         | 7.5 | 78              | 400         | 5   | 39              |
| 130  | 500         | 6   | 78              | 550         | 7   | 80              | 400         | 5   | 41              | 600         | 7.5 | 80              | 400         | 5   | 42              |

Stirrer speed: (rpm); Air: (m<sup>3</sup>/min); PO<sub>2</sub>: (%).

**Table S5.** Citrus canker disease index caused by *Xanthomonas citri* subsp. *citri* before medication.

|                       | Concentration    | Three repeat of disease |      |      | Average of disease index |
|-----------------------|------------------|-------------------------|------|------|--------------------------|
|                       |                  | index                   |      |      |                          |
|                       |                  | I                       | II   | III  |                          |
| Treatment             | 262.5 gai/ha     | 0.33                    | 0.50 | 0.33 | 0.39                     |
|                       | 187.5 gai/ha (1) | 1.75                    | 0.83 | 0.33 | 0.97                     |
|                       | 187.5 gai/ha (2) | 0.16                    | 0.50 | 0.58 | 0.41                     |
|                       | 112.5 gai/ha     | 0.83                    | 0.50 | 1.92 | 1.08                     |
| 14% Copper humic acid | 112.5 gai/ha     | 1.25                    | 1.75 | 0.42 | 1.14                     |
| Untreated             |                  | 5.33                    | 4.00 | 8.33 | 5.89                     |

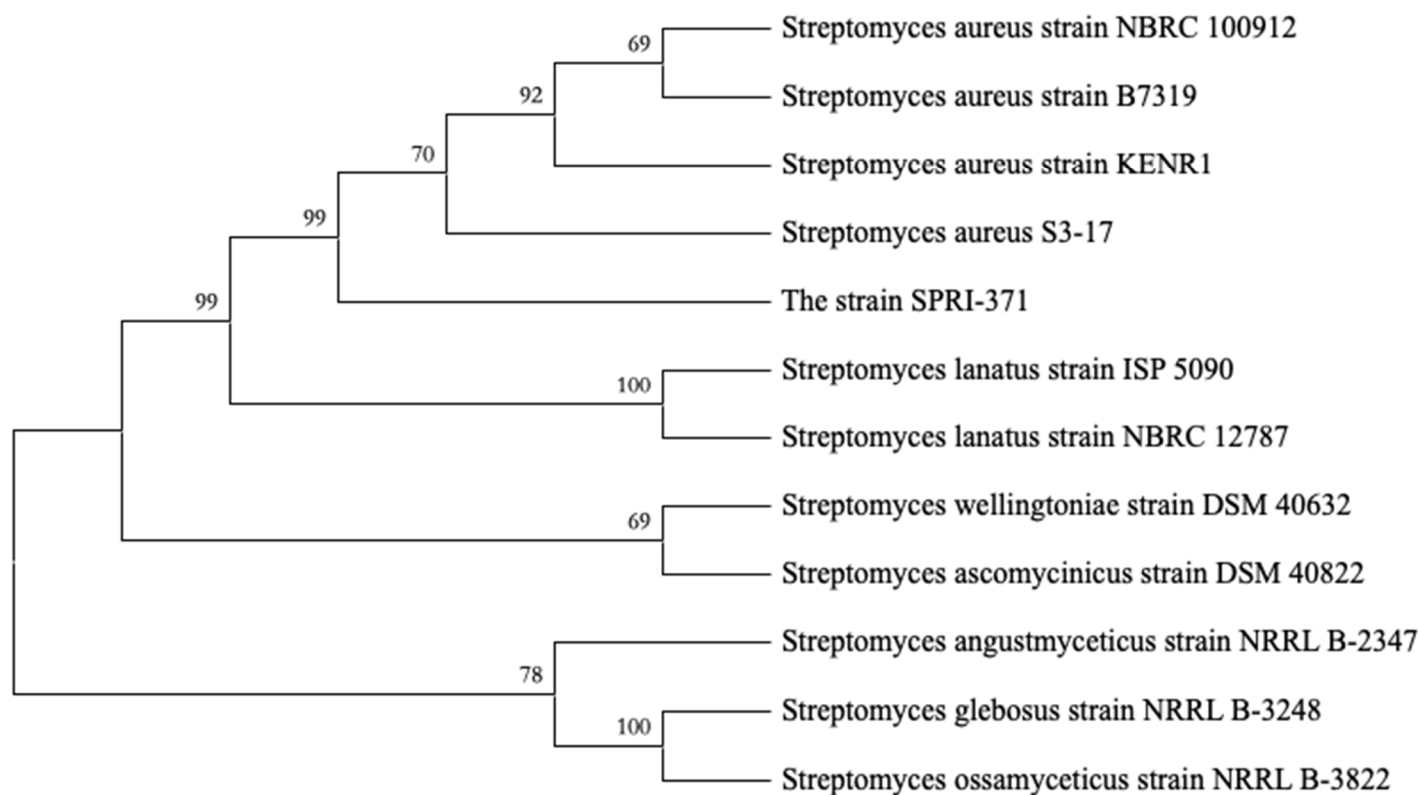

**Figure S1.** Molecular phylogenetic analysis of the strain SPRI-371 by Neighbor-Joining method. Data presented are the percentage of trees in which the associated taxa clustered together is shown next to the branches. FASTA format of the gene sequence of the closely related strain based on the result of BLAST was subjected to analysis using MEGA version 11 software using a bootstrap value of 1000.
